# Supplementary material for: Multivariate genome-wide association analysis by iterative hard thresholding
Source: PubMed Central journal article supplement (PMC10133532; doi:10.1093/bioinformatics/btad193), 2023-04-17
Supplement: btad193_supplementary_data.pdf [file btad193_supplementary_data.pdf]

# Supplement of Multivariate Genome-wide Association Analysis by Iterative Hard Thresholding

April 12, 2023

## 1 Supplementary Materials

### 1.1 SNPs Discovered by the UKB Analysis

Tables 1-5 list the SNPs discovered by our 3-trait UK Biobank analysis. For our 18-trait analysis the selected SNPs are too numerous to list. However, all result can be accessed from our software page. Table 6 lists the proportion of variance explained for the 18 traits. The reported effect sizes correspond to the predictors of the log-transformed and standardized traits. To compare against previous studies, we searched the NHGRI-EBI GWAS catalog [3] using the R package `gwasrapidd` [4]. For each SNP discovered by IHT, we queried a 1Mb radius for other SNPs that have been previously associated with the given trait with p value  $< 5 \times 10^{-8}$ . Each known association is defined by the most significant SNP in the gene or region associated with the trait. SNPs that have been mapped in the GWAS catalog are listed along with their genes. All 13 pleiotropic SNPs were previously known, and 158 out of 171 independent SNPs were previously known. Among the 13 newly discovered associations, three were with SBP and 10 were with DBP.

| SNP        | chr | pos       | BMI   | SBP    | DBP    | # prior report | mapped genes    |
|------------|-----|-----------|-------|--------|--------|----------------|-----------------|
| rs1801131  | 1   | 11854476  | 0.0   | 0.009  | 0.008  | 41             | MTHFR           |
| rs17367504 | 1   | 11862778  | 0.0   | 0.02   | 0.019  | 41             | MTHFR           |
| rs16998073 | 4   | 81184341  | 0.0   | -0.023 | -0.023 | 24             | FGF5, PRDM8     |
| rs1173727  | 5   | 32830521  | 0.0   | 0.016  | 0.017  | 19             | LINC02120, NPR3 |
| rs2307111  | 5   | 75003678  | 0.013 | 0.0    | -0.01  | 34             | POC5            |
| rs6902725  | 6   | 152370868 | 0.0   | -0.009 | 0.01   | 4              |                 |
| rs11977526 | 7   | 46008110  | 0.0   | 0.013  | -0.011 | 6              | FTLP15, IGFBP3  |
| rs2071518  | 8   | 120435812 | 0.0   | -0.008 | 0.009  | 6              | CCN3            |
| rs11222084 | 11  | 130273230 | 0.0   | -0.011 | 0.009  | 9              | ZBTB44-DT       |
| rs3184504  | 12  | 111884608 | 0.0   | -0.011 | -0.018 | 41             | SH2B3, ATXN2    |
| rs365990   | 14  | 23861811  | 0.0   | 0.008  | -0.011 | 6              | MYH6            |
| rs7497304  | 15  | 91429176  | 0.0   | -0.019 | -0.018 | 14             | FES             |
| rs77870048 | 16  | 69965021  | 0.0   | -0.011 | 0.01   | 20             | WWP2            |

Table 1: 13 pleiotropic SNPs selected by IHT listed with their effect sizes and sorted by their position on the chromosomes. An effect size of 0 means the particular predictor was not selected. The field *prior reports* records the number of SNPs previously associated with BMI, SBP, or DBP (p value <  $10^{-8}$ ) that are within 1Mb of the given SNP. BMI = body mass index; SBP = systolic blood pressure; DBP = diastolic blood pressure.

| covariate        | BMI     | SBP     | DBP     |
|------------------|---------|---------|---------|
| intercept        | 0.0002  | -0.0    | 0.0003  |
| sex              | 0.1165  | 0.1639  | 0.1808  |
| age              | 0.1073  | -0.1395 | 0.6484  |
| age <sup>2</sup> | -0.0505 | 0.4581  | -0.6131 |
| PC1              | -0.0287 | -0.0066 | -0.0074 |
| PC2              | 0.0052  | -0.0077 | -0.0011 |
| PC3              | 0.0174  | 0.0043  | -0.0091 |
| PC4              | -0.0019 | -0.0055 | 0.0015  |
| PC5              | 0.0022  | 0.0137  | 0.0167  |
| PC6              | -0.0165 | -0.0067 | -0.0056 |
| PC7              | -0.003  | -0.0038 | -0.0078 |
| PC8              | -0.0014 | -0.0015 | -0.0014 |
| PC9              | 0.0039  | -0.0004 | 0.0017  |
| PC10             | 0.0068  | 0.0005  | 0.0001  |

Table 2: Non-genetic covariates estimated by IHT listed with their effect sizes. These variables were not subject to sparsity projection. PC is short for principal component. BMI = body mass index, SBP = systolic blood pressure, and DBP = diastolic blood pressure.

| SNP        | chr | pos       | $\beta$ | # prior reports | mapped genes      | SNP        | chr | pos      | $\beta$ | # prior reports | mapped genes        |
|------------|-----|-----------|---------|-----------------|-------------------|------------|-----|----------|---------|-----------------|---------------------|
| rs2815757  | 1   | 72764289  | 0.019   | 14              | RPL31P12, NEGR1   | rs17207196 | 7   | 75101065 | 0.016   | 9               | POM121C             |
| rs543874   | 1   | 177889480 | -0.028  | 22              | SEC16B, LINC01741 | rs925946   | 11  | 27667202 | -0.007  | 24              | BDNF-AS             |
| rs2820312  | 1   | 201869257 | -0.014  | 9               | LMOD1             | rs6265     | 11  | 27679916 | 0.012   | 24              | BDNF-AS, BDNF       |
| rs62106258 | 2   | 417167    | 0.027   | 51              |                   | rs2049045  | 11  | 27694241 | 0.007   | 24              | BDNF-AS, BDNF       |
| rs11127485 | 2   | 632028    | 0.017   | 51              | TMEM18, LINC01875 | rs10835211 | 11  | 27701365 | -0.011  | 24              | BDNF-AS, BDNF       |
| rs13393304 | 2   | 637830    | 0.008   | 51              | TMEM18, LINC01875 | rs7138803  | 12  | 50247468 | -0.007  | 9               | RPL35AP28, BCDIN3D  |
| rs713586   | 2   | 25158008  | -0.026  | 26              | DNAJC27, ADCY3    | rs7132908  | 12  | 50263148 | -0.014  | 9               | FAIM2               |
| rs9821675  | 3   | 49902544  | 0.007   | 20              |                   | rs4776970  | 15  | 68080886 | 0.01    | 17              | MAP2K5              |
| rs1062633  | 3   | 49924940  | 0.012   | 20              |                   | rs16951304 | 15  | 68089618 | 0.008   | 17              |                     |
| rs957919   | 3   | 131629716 | -0.015  | 17              |                   | rs2531995  | 16  | 4013467  | 0.016   | 17              | ADCY9               |
| rs61587156 | 3   | 185831583 | 0.017   | 9               |                   | rs72793809 | 16  | 28832382 | -0.015  | 17              |                     |
| rs34811474 | 4   | 25408838  | 0.015   | 3               | ANAPC4            | rs4788190  | 16  | 29948401 | 0.019   | 16              |                     |
| rs10938397 | 4   | 45182527  | -0.022  | 17              | PRDX4P1, THAP12P9 | rs4889490  | 16  | 30823047 | 0.014   | 20              | ZNF629, Metazoa_SRP |
| rs13107325 | 4   | 103188709 | -0.026  | 7               |                   | rs1421085  | 16  | 53800954 | -0.05   | 56              | FTO                 |
| rs2112347  | 5   | 75015242  | 0.009   | 22              | SLC25A5P9, POC5   | rs17782313 | 18  | 57851097 | -0.011  | 47              | RNU4-17P, MC4R      |
| rs1422192  | 5   | 87959023  | -0.015  | 20              |                   | rs10871777 | 18  | 57851763 | -0.015  | 47              | RNU4-17P, MC4R      |
| rs2744962  | 6   | 34594440  | -0.017  | 33              |                   | rs17773430 | 18  | 57963117 | -0.014  | 45              | MC4R                |
| rs987237   | 6   | 50803050  | -0.012  | 37              | TFAP2B            | rs1800437  | 19  | 46181392 | 0.017   | 20              | GIPR                |
| rs9473932  | 6   | 50857995  | -0.009  | 37              | FTH1P5, RPS17P5   | rs3810291  | 19  | 47569003 | 0.022   | 12              | ZC3H4               |

Table 3: 38 SNPs associated with BMI independently of SBP and DBP listed with their effect sizes and sorted by their position on the chromosomes. The field *prior reports* records the number of GWAS Catalog associations with BMI ( $p$  value  $< 10^{-8}$ ) that are within 1Mb of the given SNP.

| SNP        | chr | pos       | $\beta$ | # prior reports | mapped genes         | SNP           | chr | pos       | $\beta$ | # prior reports | mapped genes       |
|------------|-----|-----------|---------|-----------------|----------------------|---------------|-----|-----------|---------|-----------------|--------------------|
| rs3936009  | 1   | 1585642   | 0.009   | 7               |                      | rs12673516    | 7   | 40432219  | 0.01    | 3               |                    |
| rs1757915  | 1   | 56615809  | -0.009  | 4               | RPSAP20, LINC01755   | rs2282978     | 7   | 92264410  | 0.016   | 4               | CDK6               |
| rs6684353  | 1   | 59638619  | 0.011   | 2               |                      | rs2392929     | 7   | 106414069 | -0.027  | 5               | LINC02577, CCDC71L |
| rs12069946 | 1   | 67045928  | -0.009  | 2               |                      | rs2978456     | 8   | 42324765  | -0.01   | 1               |                    |
| rs2820441  | 1   | 219734960 | 0.009   | 1               | LYPLAL1-AS1, ZC3H11B | Affx-32837790 | 8   | 95272605  | -0.009  | 3               |                    |
| rs1522484  | 2   | 19708967  | 0.016   | 3               |                      | rs35758124    | 8   | 141048964 | -0.01   | 2               |                    |
| rs9306894  | 2   | 20878105  | 0.009   | 4               | GDF7                 | rs10757278    | 9   | 22124477  | -0.01   | 3               | CDKN2B-AS1         |
| rs55654088 | 2   | 85499562  | -0.01   | 4               |                      | rs10986626    | 9   | 127948321 | -0.009  | 5               |                    |
| rs13002573 | 2   | 164915208 | 0.012   | 13              | intergenic           | rs12258967    | 10  | 18727959  | 0.009   | 10              | CACNB2             |
| rs560887   | 2   | 169763148 | 0.011   | 1               | SPC25, G6PC2         | rs1908339     | 10  | 75843100  | 0.01    | 4               |                    |
| rs10497529 | 2   | 179839888 | 0.011   | 3               | CCDC141              | rs11191064    | 10  | 103367824 | 0.009   | 6               |                    |
| rs1052501  | 3   | 41925398  | 0.02    | 6               | ULK4                 | rs11598702    | 10  | 104897985 | -0.011  | 17              |                    |
| rs2498323  | 4   | 3451109   | -0.008  | 3               | HGFAC                | rs4980389     | 11  | 1892585   | -0.009  | 14              | LSP1               |
| rs776590   | 4   | 48591150  | 0.008   | 2               |                      | rs573455      | 11  | 117267884 | -0.014  | 6               | CEP164             |
| rs17084051 | 4   | 55087581  | -0.01   | 3               | RPL22P13             | rs10750441    | 11  | 130469044 | 0.01    | 3               | BAK1P2, MIR8052    |
| rs1229984  | 4   | 100239319 | 0.009   | 1               | ADH1B                | rs10770612    | 12  | 20230639  | 0.012   | 9               | LINC02398          |
| rs6842241  | 4   | 148400819 | -0.008  | 2               | EDNRA, PRMT5P1       | rs2681492     | 12  | 90013089  | 0.011   | 21              | ATP2B1             |
| rs4690974  | 4   | 156393641 | -0.01   | 9               | MTND1P22             | rs12882307    | 14  | 36320639  | 0.009   | 1               |                    |
| rs13116200 | 4   | 169702511 | -0.01   | 2               |                      | rs4903064     | 14  | 73279420  | -0.01   | 5               | DPF3               |
| rs7715779  | 5   | 32690199  | 0.007   | 12              | NPR3                 | rs956006      | 15  | 62808539  | 0.009   | 1               | TLN2               |
| rs1173771  | 5   | 32815028  | 0.005   | 12              | LINC02120, NPR3      | rs34862454    | 15  | 75101530  | -0.012  | 14              | LMAN1L, CSK        |
| rs1982192  | 5   | 71540604  | 0.009   | Novel           |                      | rs3803716     | 16  | 24802325  | 0.008   | 3               |                    |
| rs2303720  | 5   | 122682334 | 0.011   | 6               | CEP120               | rs4888372     | 16  | 75313485  | 0.01    | 6               | RNU6-758P, BCAR1   |
| rs11954193 | 5   | 158256118 | 0.01    | 13              | EBF1                 | rs60675007    | 16  | 83018052  | 0.008   | 2               |                    |
| rs12198986 | 6   | 7720059   | -0.008  | 1               | BMP6                 | rs9889363     | 17  | 6524298   | -0.011  | 6               |                    |
| rs9349379  | 6   | 12903957  | 0.012   | 5               | PHACTR1              | rs185478092   | 17  | 40366653  | -0.01   | Novel           |                    |
| rs385306   | 6   | 31681160  | 0.011   | 7               |                      | rs3744760     | 17  | 43195981  | -0.01   | 9               | PLCD3              |
| rs12191865 | 6   | 56014006  | -0.014  | 3               |                      | rs17608766    | 17  | 45013271  | -0.013  | 3               | GOSR2              |
| rs1012257  | 6   | 56089507  | -0.009  | 3               |                      | rs9909933     | 17  | 46280232  | 0.009   | 7               |                    |
| rs9689048  | 6   | 73465420  | 0.009   | Novel           |                      | rs35688424    | 17  | 60769406  | -0.011  | 8               |                    |
| rs2221389  | 6   | 159719183 | -0.012  | 1               |                      | rs67882421    | 18  | 43129717  | -0.012  | 4               |                    |
| rs9505897  | 6   | 169646751 | -0.01   | 1               |                      | rs12459507    | 19  | 2224387   | -0.009  | 6               | DOT1L              |
| rs57301765 | 7   | 19052733  | -0.014  | 2               | TWIST1, HDAC9        | rs34328549    | 19  | 7253184   | 0.007   | 8               | INSR               |

Table 4: 66 SNPs associated with SBP independently of BMI and DBP listed with their effect sizes and sorted by their position on the chromosomes. The field *prior reports* records the number of GWAS Catalog associations with SBP ( $p$  value  $< 10^{-8}$ ) that are within 1Mb of the given SNP. A novel SNP is not within 1Mb of any GWAS Catalog associations.

| SNP         | chr | pos       | $\beta$ | # Prior reports | mapped genes        | SNP         | chr | pos       | $\beta$ | # Prior reports | mapped genes           |
|-------------|-----|-----------|---------|-----------------|---------------------|-------------|-----|-----------|---------|-----------------|------------------------|
| rs61776719  | 1   | 38461319  | -0.015  | Novel           | FHL3, RNU6-510P     | rs4754834   | 11  | 102017853 | -0.009  | 1               |                        |
| rs12739904  | 1   | 59669488  | -0.009  | 1               |                     | rs59317921  | 11  | 130270855 | 0.009   | 2               | ZBTB44-DT              |
| rs3766090   | 1   | 169269009 | -0.01   | Novel           |                     | rs7975252   | 12  | 15270194  | -0.009  | 1               |                        |
| rs61822997  | 1   | 176649785 | -0.009  | Novel           |                     | rs7973748   | 12  | 20164705  | 0.011   | 10              |                        |
| rs665834    | 1   | 201748087 | 0.011   | 1               |                     | rs12581906  | 12  | 20468094  | 0.009   | 10              |                        |
| rs2275155   | 1   | 243493907 | -0.013  | 6               |                     | rs17287293  | 12  | 24770878  | 0.01    | Novel           | RN7SL38P, KNOP1P1      |
| rs11690961  | 2   | 46363336  | -0.012  | 1               | PRKCE               | rs74340001  | 12  | 94769769  | -0.01   | 1               |                        |
| rs10199082  | 2   | 56040099  | -0.01   | 3               |                     | rs653178    | 12  | 112007756 | -0.007  | 16              | ATXN2                  |
| rs2692893   | 2   | 96756547  | -0.012  | 5               |                     | rs12875271  | 13  | 110792743 | 0.011   | 3               | RN7SL783P, COL4A1      |
| rs17362588  | 2   | 179721046 | -0.014  | 3               | CCDC141             | rs36033161  | 14  | 100123487 | -0.009  | Novel           | HHLPL1                 |
| rs12996836  | 2   | 183212028 | -0.011  | 3               |                     | rs686861    | 15  | 48885005  | -0.013  | 1               | FBN1                   |
| rs1863703   | 2   | 219544388 | 0.009   | 3               |                     | rs11853359  | 15  | 71621524  | 0.011   | 2               | THSD4                  |
| rs2624847   | 3   | 50174197  | -0.009  | 3               | SEMA3F-AS1          | rs1378942   | 15  | 75077367  | -0.012  | 10              | CSK                    |
| rs3617      | 3   | 52833805  | 0.008   | 5               | ITIH3               | rs4886615   | 15  | 75131661  | -0.008  | 10              |                        |
| rs9850919   | 3   | 169177924 | 0.009   | 5               | MECOM-AS1, MECOM    | rs2277547   | 15  | 79082431  | 0.01    | 1               |                        |
| rs871606    | 4   | 54799245  | -0.018  | 1               | RPL21P44, LNX1      | rs7174546   | 15  | 96637569  | -0.009  | 2               | RNU2-3P, NR2F2-AS1     |
| rs1826909   | 4   | 100217743 | -0.01   | Novel           |                     | rs67456613  | 16  | 30888295  | -0.01   | 2               |                        |
| rs1047440   | 5   | 122681834 | -0.014  | 3               |                     | rs72790195  | 16  | 83005335  | -0.008  | 1               |                        |
| rs11949055  | 5   | 131576737 | 0.009   | 5               |                     | rs11078485  | 17  | 4141536   | -0.009  | 2               |                        |
| rs1233708   | 6   | 28173219  | 0.013   | 2               |                     | rs72824497  | 17  | 15418019  | 0.009   | 1               |                        |
| rs11154022  | 6   | 121748542 | 0.01    | 3               | GJA1, Y_RNA         | rs768168    | 19  | 15268533  | -0.011  | Novel           |                        |
| rs12110693  | 6   | 122158270 | -0.012  | 3               | OSTM1, HMGB3P18     | rs997669    | 19  | 30304483  | -0.01   | 2               | CCNE1                  |
| rs9376740   | 6   | 143617983 | -0.009  | Novel           |                     | rs755690    | 19  | 39167360  | -0.01   | 1               |                        |
| rs58023137  | 6   | 169620760 | -0.011  | 1               |                     | rs2876201   | 20  | 10429851  | -0.009  | 6               |                        |
| rs194524    | 7   | 89861832  | -0.012  | Novel           |                     | rs652661    | 20  | 10468779  | 0.015   | 6               |                        |
| rs13226502  | 7   | 100506381 | -0.014  | 2               | RPS29P15, RN7SL549P | rs78309244  | 20  | 10766399  | 0.014   | 6               |                        |
| rs2469997   | 8   | 120353267 | 0.01    | 3               | CCN3, MIR548AZ      | rs6046144   | 20  | 19477390  | 0.015   | 2               |                        |
| rs507666    | 9   | 136149399 | 0.012   | 2               |                     | rs76701589  | 20  | 39763115  | 0.009   | 3               |                        |
| rs3812595   | 9   | 139369062 | -0.009  | 1               | SEC16A              | rs2831969   | 21  | 30085640  | 0.009   | Novel           |                        |
| rs183348357 | 10  | 18220414  | -0.009  | 7               |                     | rs9982601   | 21  | 35599128  | -0.009  | 1               | LINC00310, KCNE2       |
| rs3739998   | 10  | 30316072  | 0.005   | 1               | JCAD                | rs2298336   | 21  | 39813287  | 0.01    | 1               |                        |
| rs2505083   | 10  | 30335122  | 0.007   | 1               | JCAD                | rs112005532 | 21  | 39957981  | 0.012   | 1               | ERG                    |
| rs7125196   | 11  | 61272565  | 0.01    | 5               | PPP1R32, MIR4488    | rs73167017  | 22  | 40779964  | 0.011   | 1               | SGSM3, SGSM3-AS1, ADSL |
| rs2304500   | 11  | 89223931  | -0.012  | 1               | NOX4                |             |     |           |         |                 |                        |

Table 5: 67 SNPs associated with DBP independently of BMI and SBP listed with their effect sizes and sorted by their positions on the chromosomes. The field *prior reports* records the number of GWAS Catalog associations with DBP ( $p$  value  $< 10^{-8}$ ) that are within 1Mb of the given SNP. A novel SNP is not within 1Mb of any GWAS Catalog associations.

| Field ID | Trait                                                 | PVE    |
|----------|-------------------------------------------------------|--------|
| 23723    | Total Lipids in Lipoprotein Particles                 | 0.0178 |
| 23724    | Total Lipids in VLDL                                  | 0.0423 |
| 23725    | Total Lipids in LDL                                   | 0.0245 |
| 23726    | Total Lipids in HDL                                   | 0.0365 |
| 23782    | Total Lipids in Chylomicrons and Extremely Large VLDL | 0.0482 |
| 23789    | Total Lipids in Very Large VLDL                       | 0.0547 |
| 23796    | Total Lipids in Large VLDL                            | 0.0501 |
| 23803    | Total Lipids in Medium VLDL                           | 0.0332 |
| 23810    | Total Lipids in Small VLDL                            | 0.0432 |
| 23817    | Total Lipids in Very Small VLDL                       | 0.0370 |
| 23824    | Total Lipids in IDL                                   | 0.0268 |
| 23831    | Total Lipids in Large LDL                             | 0.0250 |
| 23838    | Total Lipids in Medium LDL                            | 0.0230 |
| 23845    | Total Lipids in Small LDL                             | 0.0268 |
| 23852    | Total Lipids in Very Large HDL                        | 0.0515 |
| 23859    | Total Lipids in Large HDL                             | 0.0538 |
| 23866    | Total Lipids in Medium HDL                            | 0.0268 |
| 23873    | Total Lipids in Small HDL                             | 0.0136 |

Table 6: The estimated Proportion of phenotypic variance explained (PVE) for each of the 18 traits in the UK Biobank analysis.

## 1.2 IHT on LD-Pruned Genotypes

In Figure 1 of the main text, we compared the false positive counts of IHT, CCA, and mvLMM. Similar to Table 1 in the main text, we also computed the power for detecting independent and pleiotropic SNPs in these simulations. These results are presented in Figure 1.

## 1.3 Additional Simulation Studies for IHT

In the main text, our simulation study explores the situation where causal SNPs are shared roughly equally among all traits. This is a reasonable assumption because we expect most multivariate GWAS to be conducted on similar traits, which are expected to share a similar number of causal variants. However, in practice, researchers may confront both highly polygenic traits along with very non-polygenic traits.

Here we describe a simulation study with three traits, where each trait is perturbed by 10, 100, or 1000 causal SNPs, respectively. We use  $n = 10,000$  unrelated subjects from the UK Biobank and restrict analysis to a genotype matrix constructed from 29,481 SNPs on chromosome 10. Traits  $\mathbf{Y}_{r \times 10000}$  are simulated just as in our main simulation study. We ignore the genetic relationship matrix since related subjects have been

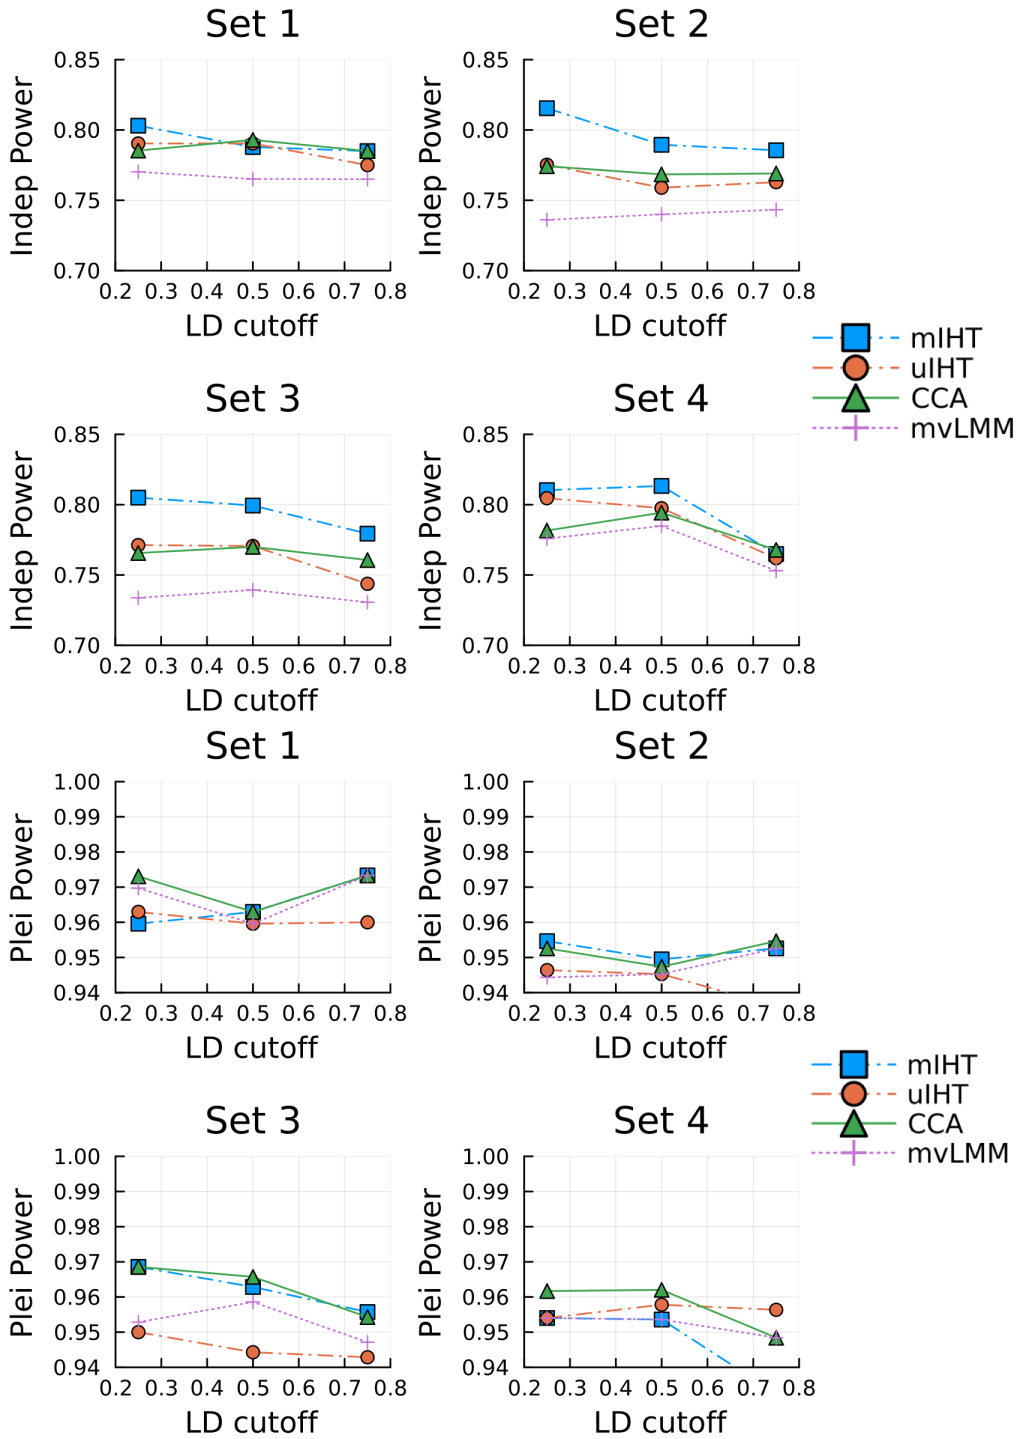

Figure 1: Power comparison for independent (top 4) and pleiotropic (bottom 4) SNPs evaluated on LD-pruned genotypes that are in increasing linkage equilibrium. The x-axis corresponds to filtering the original NFBC chr1 genotypes at different pairwise correlation cutoffs, a smaller value means more aggressive pruning.

|                        | Power | FDR   |
|------------------------|-------|-------|
| Trait 1 ( $k = 10$ )   | 0.417 | 0.408 |
| Trait 2 ( $k = 100$ )  | 0.316 | 0.385 |
| Trait 3 ( $k = 1000$ ) | 0.250 | 0.362 |
| Overall                | 0.258 | 0.366 |

Table 7: Multivariate IHT analyzing three simulated traits of different polygenicity. The three traits have 10, 100, and 1000 causal SNPs.

filtered out. In summary,

$$\mathbf{Y}_{3 \times n} \sim \text{MatrixNormal}(\mathbf{B}_{3 \times p} \mathbf{X}_{p \times n}, \mathbf{\Sigma}_{3 \times 3}, \mathbf{I}_{n \times n}).$$

For the  $r$ th trait,  $r \in \{1, 2, 3\}$ , the effect sizes of the causal SNPs  $j \in \mathcal{S}_{r,\text{causal}}$  are Gaussian deviates  $\beta_j \sim N(0, 0.1)$  with  $|\mathcal{S}_{1,\text{causal}}| = 10$ ,  $|\mathcal{S}_{2,\text{causal}}| = 100$ , and  $|\mathcal{S}_{3,\text{causal}}| = 1000$ . The causal SNP indices are chosen uniformly across the chromosome. The covariance between traits,  $\mathbf{\Sigma}_{3 \times 3}$ , is generated as in our main simulation.

Table 7 reports the power and false discovery rate (FDR) for each trait separately, along with the overall power and FDR. Observe that FDR decreases as the number of causal SNPs  $k$  increases. Notably mIHT tends to select more SNPs than needed for a less polygenic trait if it is analyzed in unison with a highly polygenic trait. Obviously, this bias improves if we increase sample size or true effect sizes. Overall, these results suggest that one must be careful in analyzing multiple traits of vastly different polygenicity.

## 1.4 Loglikelihood

Consider multivariate linear regression with  $r$  traits under a Gaussian model. Up to a constant, the loglikelihood for the response vector  $\mathbf{y}_i$  of subject  $i$  can be written

$$\begin{aligned} \mathcal{L}_i(\mathbf{B}, \mathbf{\Gamma}) &= \frac{1}{2} \log(\det \mathbf{\Gamma}) - \frac{1}{2} (\mathbf{y}_i - \mathbf{B}\mathbf{x}_i)^T \mathbf{\Gamma} (\mathbf{y}_i - \mathbf{B}\mathbf{x}_i) \\ &= \frac{1}{2} \log(\det \mathbf{\Gamma}) - \frac{1}{2} \text{tr}[\mathbf{\Gamma} (\mathbf{y}_i - \mathbf{B}\mathbf{x}_i) (\mathbf{y}_i - \mathbf{B}\mathbf{x}_i)^T], \end{aligned}$$

where  $\mathbf{B}$  is the  $r \times p$  matrix of regression coefficients,  $\mathbf{x}_i$  is the  $p \times 1$  vector of predictors, and  $\mathbf{\Gamma}$  is the  $r \times r$  unstructured precision (inverse covariance) matrix. For  $n$  independent subjects, let  $\mathbf{Y}$  be the  $r \times n$  matrix with  $i$ th column  $\mathbf{y}_i$  and let  $\mathbf{X}$  be the  $p \times n$  design matrix with  $i$ th column  $\mathbf{x}_i$ . Then the loglikelihood for all subjects is

$$\begin{aligned} \mathcal{L}(\mathbf{B}, \mathbf{\Gamma}) &= \sum_{i=1}^n \left\{ \frac{1}{2} \log(\det \mathbf{\Gamma}) - \frac{1}{2} \text{tr}[\mathbf{\Gamma} (\mathbf{y}_i - \mathbf{B}\mathbf{x}_i) (\mathbf{y}_i - \mathbf{B}\mathbf{x}_i)^T] \right\} \\ &= \frac{n}{2} \log(\det \mathbf{\Gamma}) - \frac{1}{2} \text{tr} \left[ \mathbf{\Gamma} \sum_{i=1}^n (\mathbf{y}_i - \mathbf{B}\mathbf{x}_i) (\mathbf{y}_i - \mathbf{B}\mathbf{x}_i)^T \right] \\ &= \frac{n}{2} \log(\det \mathbf{\Gamma}) - \frac{1}{2} \text{tr}[(\mathbf{\Gamma} (\mathbf{Y} - \mathbf{B}\mathbf{X}) (\mathbf{Y} - \mathbf{B}\mathbf{X})^T)]. \end{aligned}$$



In subsequent sections we will present both full and block ascent IHT. The former updates  $\mathbf{B}$  and  $\mathbf{\Gamma}$  simultaneously. The latter alternates updates of  $\mathbf{B}$  and  $\mathbf{\Gamma}$ , holding the other parameter block fixed.

## 1.5 First Directional Derivative

Recall that the Hadamard's semi-directional derivative [1, 2] of a function  $f(\mathbf{x})$  in the direction  $\mathbf{v}$  is defined as the limit

$$d_{\mathbf{v}}f(\mathbf{x}) = \lim_{\substack{h \rightarrow 0 \\ \mathbf{w} \rightarrow \mathbf{v}}} \frac{f(\mathbf{x} + h\mathbf{w}) - f(\mathbf{x})}{h}.$$

To calculate the directional derivative of the loglikelihood (eq 1 in main text), we perturb  $\mathbf{B}$  in the direction  $\mathbf{U}$  and  $\mathbf{\Gamma}$  in the symmetric direction  $\mathbf{V}$ . The sum and product rules then give

$$\begin{aligned} & d_{(\mathbf{U}, \mathbf{V})} \text{tr}[\mathbf{\Gamma}(\mathbf{Y} - \mathbf{B}\mathbf{X})(\mathbf{Y} - \mathbf{B}\mathbf{X})^T] \\ &= \text{tr}[\mathbf{V}(\mathbf{Y} - \mathbf{B}\mathbf{X})(\mathbf{Y} - \mathbf{B}\mathbf{X})^T] - \text{tr}[\mathbf{\Gamma}(\mathbf{Y} - \mathbf{B}\mathbf{X})\mathbf{X}^T\mathbf{U}^T + \mathbf{\Gamma}\mathbf{U}\mathbf{X}(\mathbf{Y} - \mathbf{B}\mathbf{X})^T]. \end{aligned}$$

The directional derivative  $d_{\mathbf{V}} \log \det(\mathbf{\Gamma}) = \text{tr}(\mathbf{\Gamma}^{-1}\mathbf{V})$  is derived in Example 3.2.6 of [2]. The trace properties  $\text{tr}(\mathbf{C}\mathbf{D}) = \text{tr}(\mathbf{D}\mathbf{C})$  and  $\text{tr}(\mathbf{C}^T) = \text{tr}(\mathbf{C})$  consequently imply

$$d_{(\mathbf{U}, \mathbf{V})} \mathcal{L}(\mathbf{B}, \mathbf{\Gamma}) = \frac{n}{2} \text{tr}(\mathbf{\Gamma}^{-1}\mathbf{V}) - \frac{1}{2} \text{tr}[(\mathbf{Y} - \mathbf{B}\mathbf{X})(\mathbf{Y} - \mathbf{B}\mathbf{X})^T\mathbf{V}] + \text{tr}[\mathbf{X}(\mathbf{Y} - \mathbf{B}\mathbf{X})^T\mathbf{\Gamma}\mathbf{U}]. \quad (1.1)$$

Because this last expression is linear in  $(\mathbf{U}, \mathbf{V})$ , the loglikelihood is continuously differentiable.

## 1.6 Second Directional Derivative

Now we take the directional derivative of the directional derivative (1.1) in the new directions  $\tilde{\mathbf{U}}$  and  $\tilde{\mathbf{V}}$ . This action requires the inverse rule  $d_{\tilde{\mathbf{V}}}\mathbf{\Gamma}^{-1} = -\mathbf{\Gamma}^{-1}\tilde{\mathbf{V}}\mathbf{\Gamma}^{-1}$  proved in Example 3.2.7 of [2]. Accordingly, we find

$$d_{(\tilde{\mathbf{U}}, \tilde{\mathbf{V}})} \frac{n}{2} \text{tr}(\mathbf{\Gamma}^{-1}\mathbf{V}) = -\frac{n}{2} \text{tr}(\mathbf{\Gamma}^{-1}\tilde{\mathbf{V}}\mathbf{\Gamma}^{-1}\mathbf{V}).$$

We also calculate

$$d_{(\tilde{\mathbf{U}}, \tilde{\mathbf{V}})} \left[ -\frac{1}{2} \text{tr}[(\mathbf{Y} - \mathbf{B}\mathbf{X})(\mathbf{Y} - \mathbf{B}\mathbf{X})^T\mathbf{V}] \right] = \frac{1}{2} \text{tr}[(\mathbf{Y} - \mathbf{B}\mathbf{X})\mathbf{X}^T\tilde{\mathbf{U}}^T\mathbf{V}] + \frac{1}{2} \text{tr}[\tilde{\mathbf{U}}\mathbf{X}(\mathbf{Y} - \mathbf{B}\mathbf{X})^T\mathbf{V}]$$

and

$$d_{(\tilde{\mathbf{U}}, \tilde{\mathbf{V}})} \text{tr}[\mathbf{X}(\mathbf{Y} - \mathbf{B}\mathbf{X})^T\mathbf{\Gamma}\mathbf{U}] = \text{tr}[\mathbf{X}(\mathbf{Y} - \mathbf{B}\mathbf{X})^T\tilde{\mathbf{V}}\mathbf{U}] - \text{tr}(\mathbf{X}^T\tilde{\mathbf{U}}^T\mathbf{\Gamma}\mathbf{U}\mathbf{X}).$$

Finally, setting the two directions equal so that  $\tilde{\mathbf{V}} = \mathbf{V}$  and  $\tilde{\mathbf{U}} = \mathbf{U}$  produces the quadratic form

$$\begin{aligned} Q(\mathbf{U}, \mathbf{V}) &= -\frac{n}{2} \text{tr}[\mathbf{\Gamma}^{-1}\mathbf{V}\mathbf{\Gamma}^{-1}\mathbf{V}] + \frac{1}{2} \text{tr}[(\mathbf{Y} - \mathbf{B}\mathbf{X})\mathbf{X}^T\mathbf{U}^T\mathbf{V}] + \frac{1}{2} \text{tr}[\mathbf{U}\mathbf{X}(\mathbf{Y} - \mathbf{B}\mathbf{X})^T\mathbf{V}] \\ &\quad + \text{tr}[\mathbf{X}(\mathbf{Y} - \mathbf{B}\mathbf{X})^T\mathbf{V}\mathbf{U}] - \text{tr}(\mathbf{X}^T\mathbf{U}^T\mathbf{\Gamma}\mathbf{U}\mathbf{X}). \end{aligned} \quad (1.2)$$

generated by the second differential.

## 1.7 Extraction of the Gradient and Expected Information

To extract the gradient from a directional derivative, we recall the identity  $d_{\mathbf{v}}f(\mathbf{x}) = \nabla f(\mathbf{x})^T \mathbf{v}$  for vectors  $\mathbf{v}$  and  $\mathbf{x}$  and the identity  $\text{tr}(\mathbf{A}^T \mathbf{B}) = \text{vec}(\mathbf{A})^T \text{vec}(\mathbf{B})$  for matrices  $\mathbf{A}$  and  $\mathbf{B}$  [5]. The first identity shows that the directional derivative is the inner product of the gradient with respect to the direction  $\mathbf{v}$ . The second displays the trace function as an inner product on dimensionally identical matrices. Thus, the matrix directional derivative is

$$d_{\mathbf{V}}f(\mathbf{X}) = \text{vec}[\nabla f(\mathbf{X})]^T \text{vec}(\mathbf{V}) = \text{tr}[\nabla f(\mathbf{X})^T \mathbf{V}]. \quad (1.3)$$

Inspection of the directional derivative (1.1) now leads to the gradient with blocks

$$\nabla_{\mathbf{B}}\mathcal{L}(\mathbf{B}, \Gamma) = [\mathbf{X}(\mathbf{Y} - \mathbf{B}\mathbf{X})^T \Gamma]^T = \Gamma(\mathbf{Y} - \mathbf{B}\mathbf{X})\mathbf{X}^T \quad (1.4)$$

$$\nabla_{\Gamma}\mathcal{L}(\mathbf{B}, \Gamma) = \frac{n}{2}\Gamma^{-1} - \frac{1}{2}(\mathbf{Y} - \mathbf{B}\mathbf{X})(\mathbf{Y} - \mathbf{B}\mathbf{X})^T. \quad (1.5)$$

Analogously, the quadratic form (1.2) implicitly defines the Hessian  $\mathbf{H}$  through the identity

$$\begin{aligned} Q(\mathbf{U}, \mathbf{V}) &= \text{tr} \left\{ \begin{bmatrix} \text{vec}(\mathbf{U})^T & \text{vec}(\mathbf{V})^T \end{bmatrix} \begin{pmatrix} \mathbf{H}_{\mathbf{B}\mathbf{B}} & \mathbf{H}_{\mathbf{B}\Gamma} \\ \mathbf{H}_{\Gamma\mathbf{B}} & \mathbf{H}_{\Gamma\Gamma} \end{pmatrix} \begin{bmatrix} \text{vec}(\mathbf{U}) \\ \text{vec}(\mathbf{V}) \end{bmatrix} \right\} \\ &\equiv -\frac{n}{2} \text{tr} [\Gamma^{-1} \mathbf{V} \Gamma^{-1} \mathbf{V}] + \frac{1}{2} \text{tr} [(\mathbf{Y} - \mathbf{B}\mathbf{X})\mathbf{X}^T \mathbf{U}^T \mathbf{V}] \\ &\quad + \frac{1}{2} \text{tr} [\mathbf{U}\mathbf{X}(\mathbf{Y} - \mathbf{B}\mathbf{X})^T \mathbf{V}] + \text{tr} [\mathbf{X}(\mathbf{Y} - \mathbf{B}\mathbf{X})^T \mathbf{V}\mathbf{U}] - \text{tr}(\mathbf{X}^T \mathbf{U}^T \Gamma \mathbf{U}\mathbf{X}). \end{aligned}$$

Because  $E(\mathbf{Y}) = \mathbf{B}\mathbf{X}$ , the expected information  $\mathbf{J} = E(-\mathbf{H})$  has the off-diagonal blocks  $\mathbf{J}_{\mathbf{B},\Gamma} = \mathbf{0}_{pr \times r^2}$  and  $\mathbf{J}_{\Gamma,\mathbf{B}} = \mathbf{0}_{r^2 \times pr}$ . Now the Kronecker product identity  $\text{vec}(\mathbf{ABC}) = (\mathbf{C}^T \otimes \mathbf{A}) \text{vec}(\mathbf{B})$  implies

$$\begin{aligned} \text{tr}(\mathbf{X}^T \mathbf{U}^T \Gamma \mathbf{U}\mathbf{X}) &= \text{tr}(\mathbf{X}\mathbf{X}^T \mathbf{U}^T \Gamma \mathbf{U}) \\ &= \text{tr}[(\Gamma \mathbf{U}\mathbf{X}\mathbf{X}^T)^T \mathbf{U}] \\ &= \text{vec}(\Gamma \mathbf{U}\mathbf{X}\mathbf{X}^T)^T \text{vec}(\mathbf{U}) \\ &= [(\mathbf{X}\mathbf{X}^T \otimes \Gamma) \text{vec}(\mathbf{U})]^T \text{vec}(\mathbf{U}) \\ &= \text{vec}(\mathbf{U})^T (\mathbf{X}\mathbf{X}^T \otimes \Gamma) \text{vec}(\mathbf{U}). \end{aligned}$$

It follows that  $\mathbf{J}_{\mathbf{B}\mathbf{B}} = \mathbf{X}\mathbf{X}^T \otimes \Gamma$ . Similarly,

$$\begin{aligned} \text{tr}(\Gamma^{-1} \mathbf{V} \Gamma^{-1} \mathbf{V}) &= [(\Gamma^{-1} \otimes \Gamma^{-1}) \text{vec}(\mathbf{V})]^T \text{vec}(\mathbf{V}) \\ &= \text{vec}(\mathbf{V})^T [\Gamma^{-1} \otimes \Gamma^{-1}] \text{vec}(\mathbf{V}), \end{aligned}$$

so that  $\mathbf{J}_{\Gamma\Gamma} = \Gamma^{-1} \otimes \Gamma^{-1}$ . In summary, the expected information matrix takes the block diagonal form

$$\mathbf{J} = \begin{pmatrix} (\mathbf{X}\mathbf{X}^T) \otimes \Gamma & \mathbf{0} \\ \mathbf{0} & \Gamma^{-1} \otimes \Gamma^{-1} \end{pmatrix}. \quad (1.6)$$

In our projected steepest ascent algorithm, the expected information matrix is never explicitly formed. It is implicitly accessed in the step-size calculation through the associated quadratic form  $Q(\mathbf{B}, \Gamma)$ .

## 1.8 Full IHT Step Size

Let  $(\mathbf{B}, \Gamma)$  be the matrix of regression coefficients and variance components obtained by horizontally conta-tentaing  $\Gamma \in \mathbb{R}^{r \times r}$  to  $\mathbf{B} \in \mathbb{R}^{r \times p}$ . The next iterate in full IHT is the projection of the point

$$\Delta_{m+1} = (\mathbf{B}_m, \Gamma_m) + t_m \nabla \mathcal{L}(\mathbf{B}_m, \Gamma_m) = (\mathbf{B}_m, \Gamma_m) + t_m (\mathbf{C}_m, \mathbf{W}_m), \quad (1.7)$$

where  $\mathbf{C}_m = \nabla_{\mathbf{B}} \mathcal{L}$  and  $\mathbf{W}_m = \nabla_{\Gamma} \mathcal{L}$  evaluated at  $(\mathbf{B}_m, \Gamma_m)$ . The loglikelihood along the ascent direction is a function of the scalar  $t_m$  and can be approximated by the second-order expansion

$$\mathcal{L}(\Delta_{m+1}) \approx \mathcal{L}(\mathbf{B}_m, \Gamma_m) + t_m \text{tr} [(\mathbf{C}_m, \mathbf{W}_m)^T (\mathbf{C}_m, \mathbf{W}_m)] - \frac{t_m^2}{2} \text{tr} [(\mathbf{C}_m, \mathbf{W}_m)^T \mathbf{J}(\mathbf{B}_m, \Gamma_m) (\mathbf{C}_m, \mathbf{W}_m)].$$

The choice

$$t_m = \frac{\text{tr} [(\mathbf{C}_m, \mathbf{W}_m)^T (\mathbf{C}_m, \mathbf{W}_m)]}{\text{tr} [(\mathbf{C}_m, \mathbf{W}_m)^T \mathbf{J}(\mathbf{B}_m, \Gamma_m) (\mathbf{C}_m, \mathbf{W}_m)]} = \frac{\|(\mathbf{C}_m, \mathbf{W}_m)\|_F^2}{\text{tr}(\mathbf{X}^T \mathbf{C}_m^T \Gamma_m \mathbf{C}_m \mathbf{X}) + \frac{m}{2} \text{tr}(\Gamma_m^{-1} \mathbf{W}_m \Gamma_m^{-1} \mathbf{W}_m)}$$

maximizes the approximation. If the support of the matrix  $(\mathbf{B}, \Gamma)$  does not change under projection, then this IHT update is particularly apt.

## 1.9 IHT Projection

Recall that full IHT iterates according to

$$(\mathbf{B}_{m+1}, \Gamma_{m+1}) = P_{S_k}(\Delta_{m+1}),$$

where  $\Delta_{m+1}$  is derived in equation (1.7). Here  $k$  is a positive integer representing the sparsity level, which is assumed known. In practice  $k$  is found through cross-validation. The projection  $P_{S_k}(\Delta)$  splits into separate projections for  $\mathbf{B}$  and  $\Gamma$ . One can independently project each row of  $\mathbf{B}$  to sparsity. Alternatively, one can require each row of  $\mathbf{B}$  to have the same sparsity pattern if the same set of predictors plausibly contribute to all  $r$  traits. The  $\Gamma$  projection must preserve symmetry and positive semidefiniteness. Symmetry is automatic because the gradient of  $\Gamma$  is already symmetric. To project to positive semidefiniteness, one takes the singular value decomposition of  $\Gamma$  and project its eigenvalues  $\lambda$  to nonnegativity. One can even project  $\Gamma$  to the closest positive definite matrix with an acceptable condition number [6].

## 1.10 The Block Ascent IHT

In block ascent we alternate updates of  $\mathbf{B}$  and  $\mathbf{\Gamma}$ . The exact update (eq 4 of main text) of  $\mathbf{\Gamma}$  is particularly convenient, and we take advantage of it. Symmetry and positive semidefiniteness are automatically preserved. Inversion can be carried out via Cholesky factorization of  $\mathbf{\Gamma}$ . This choice of  $\mathbf{\Gamma}$  simplifies the step length

$$t_m = \frac{\|\mathbf{C}_m\|_F^2}{\text{tr}(\mathbf{X}^T \mathbf{C}_m^T \mathbf{\Gamma} \mathbf{C}_m \mathbf{X})}.$$

Note that the denominator of the step size does not require formation of the  $n \times n$  matrix  $\mathbf{X}^T \mathbf{C}_m^T \mathbf{\Gamma} \mathbf{C}_m \mathbf{X}$ . One can write  $\text{tr}(\mathbf{X}^T \mathbf{C}_m^T \mathbf{\Gamma} \mathbf{C}_m \mathbf{X}) = \text{tr}(\mathbf{X}^T \mathbf{C}_m^T \mathbf{L} \mathbf{L}^T \mathbf{C}_m \mathbf{X}) = \|\mathbf{L}^T \mathbf{C}_m \mathbf{X}\|_F^2$ , where  $\mathbf{L}$  is the Cholesky factor of  $\mathbf{\Gamma}$ . The matrix  $\mathbf{L}^T \mathbf{C}_m \mathbf{X}$  is fortunately only  $r \times n$ .

## 1.11 UK Biobank Runtime Script

Here is the script used to perform our UK Biobank analysis

```
#
# Parameter explanations
# MvNormal: Distribution of traits is multivariate normal
# q: number of cross-validation folds
# min_iter: iterate at least 10 times before checking for convergence
#

using MendelIHT, Random, LinearAlgebra
BLAS.set_num_threads(1)
Random.seed!(2022)
plinkfile = "ukb.merged.metabolic.subset.european.400K.QC"
phenotypes = "traits.reordered.standardized.csv"
covariates = "covariates.reordered.standardized.csv"

# cross validate 1000, 2000, ..., 10000
path = 1000:1000:10000
@time mses = cross_validate(plinkfile, MvNormal, path=path, q=3,
    covariates=covariates, phenotypes=phenotypes, min_iter=10,
    cv_summaryfile="cviht.summary.roughpath1.txt")

# cross validate 3100, 3200, ..., 4900
k_rough_guess = path[argmin(mses)]
```

```

path = (k_rough_guess - 900):100:(k_rough_guess + 900)
@time mses = cross_validate(plinkfile, MvNormal, path=path, q=3,
    covariates=covariates, phenotypes=phenotypes, min_iter=10,
    cv_summaryfile="cviht.summary.roughpath2.txt")

# cross validate 4510, 4520, ..., 4690
k_rough_guess = path[argmin(mses)]
path = (k_rough_guess - 90):10:(k_rough_guess + 90)
@time mses = cross_validate(plinkfile, MvNormal, path=path, q=3,
    covariates=covariates, phenotypes=phenotypes, min_iter=10,
    cv_summaryfile="cviht.summary.roughpath3.txt")

# cross validate 4671, 4672, ..., 4689
k_rough_guess = path[argmin(mses)]
path = (k_rough_guess - 9):(k_rough_guess + 9)
@time mses = cross_validate(plinkfile, MvNormal, path=path, q=3,
    covariates=covariates, phenotypes=phenotypes, min_iter=10,
    cv_summaryfile="cviht.summary.final.txt")

# run full IHT on k = 4678
K = path[argmin(mses)]
@time iht_result = iht(plinkfile, K, MvNormal,
    summaryfile = "iht.final.summary.txt",
    betafile = "iht.final.beta.txt",
    covariancefile = "iht.final.cov.txt",
    covariates=covariates, phenotypes=phenotypes, max_iter=2000)

```

## 2 Acknowledgements

This work is partially supported by National Institutes of Health grants T32-HG02536 (BC), R01-HG006139 (BC, KL, HZ), R35 GM141798 (KL, JS, HZ), R01-HG009120 (JS), K01DK106116 (JJZ), and R21HL150374 (JJZ); National Science Foundation grants DMS-1264153 (JS), DMS-2054253 (HZ, JZ), and IIS-2205441 (HZ, JZ); and a National Research Foundation of Korea (NRF) grant 2020R1A6A3A03037675 (SK) from the Korean government. The UCLA Institute for Digital Research and Education's Research Technology Group supplied computational and storage services through its Hoffman2 Shared Cluster.

### 3 Author Contributions

KL conceived the project. BC, JS, and KL devised the methods and simulations. BC, SK, and HZ wrote the software. JZ and AJ accessed and analyzed the UK Biobank data. BC wrote the initial draft of the paper. All authors reviewed and edited the draft.

### 4 Competing interests

The authors declare no competing interests.

### 5 Web Resources

**Project name:** MendelIHT.jl

**Project home page:** <https://github.com/OpenMendel/MendelIHT.jl>

**Supported operating systems:** Mac OS, Linux, Windows

**Programming language:** Julia (unit tests pass on Julia 1.6 and 1.7 but MendelIHT.jl should work with all Julia 1.x versions)

**License:** MIT

All outputs and commands needed to reproduce the following results are available at the MendelIHT site in the manuscript sub-folder. SnpArrays.jl is available at <https://github.com/OpenMendel/SnpArrays.jl>. VCFTools.jl is available at <https://github.com/OpenMendel/VCFTools.jl>. BGEN.jl is available at <https://github.com/OpenMendel/BGEN.jl>

### References

- [1] M. C. Delfour. *Introduction to Optimization and Semidifferential Calculus*. SIAM, 2012.
- [2] K. Lange. *MM Optimization Algorithms*, volume 147. SIAM, 2016.
- [3] J. MacArthur, E. Bowler, M. Cerezo, L. Gil, P. Hall, E. Hastings, H. Junkins, A. McMahon, A. Milano, J. Morales, et al. The new NHGRI-EBI catalog of published genome-wide association studies (GWAS Catalog). *Nucleic Acids Research*, 45(D1):D896–D901, 2017.
- [4] R. Magno and A.-T. Maia. gwasrapidd: an R package to query, download and wrangle GWAS Catalog data. *Bioinformatics*, 36(2):649–650, 2019.
- [5] J. R. Magnus and H. Neudecker. *Matrix Differential Calculus with Applications in Statistics and Econometrics*, 2nd edition. John Wiley & Sons, 2019.

- [6] M. Tanaka and K. Nakata. Positive definite matrix approximation with condition number constraint. *Optimization Letters*, 8(3):939–947, 2014.
